# Supplementary material
Source: publisher site journal article supplement (https://dez.pensoft.net/article/4295/download/suppl/31/)
Supplement: Supplementary file 1

**Tab. 1:** Figure numbers in present work and in references that served as template.

| **Figure number present work** | **Species** | **Reference** | **Figure number in reference** |
| --- | --- | --- | --- |
| 2 | *Stenobiella cardaleae* | Aspöck and Aspöck (1984) | 27 |
| 3 | *Isoscelipteron rufum* | Aspöck and Aspöck (1981) | 10 |
| 4 | *Trichoma gracilipenne* | Aspöck and Aspöck (1985) | 1 |
| 5 | *Austroberothella rieki* | Aspöck and Aspöck (1985) | 25 |
| 6 | *Austroberothella rieki* | Aspöck and Aspöck (1985) | 28 |
| 7 | *Trichoberotha ferruginea* | Aspöck and Aspöck (1985) | 14 |
| 8 | *Trichoma gracilipenne* | Aspöck and Aspöck (1985) | 6 |
| 9 | *Spermophorella goobita* | Aspöck and Aspöck (1986) | 22 |
| 10 | *Spermophorella sp*. | Gibson (2008) | PaDIL - <http://www.padil.gov.au> |
| 11 | *Quasispermophorella ingwa* | Aspöck and Aspöck (1986a) | 34 |
| 12 | *Spermophorella goobita* | Aspöck and Aspöck (1986a) | 24 |
| 13 | *Austroberothella rieki* | Aspöck and Aspöck (1988c) | 7 |
| 14 | *Trichoberotha ferruginea* | Aspöck and Aspöck (1984b) | 12 |
| 15 | *Spermophorella kurtbaueri* | Aspöck and Aspöck (1986b) | 18 |
| 16 | *Quasispermophorella ingwa* | Aspöck and Aspöck (1986a) | 31 |
| 17 | *Berotha indica* | Aspöck (1983) | 8 |
| 18 | *Lekrugeria koenigi* | Aspöck and Aspöck (1986c) | 20 |
| 20 | *Nyrma kervillea* | Aspöck and Aspöck (1979) | 2 |
| 21 | *Nyrma kervillea* | Aspöck (1989) | 1 |
| 24 | *Asadeteva vartianorum* | Aspöck and Aspöck (1981b) | 30 |
| 25 | *Podallea arabica* | Aspöck and Aspöck (1981a) | 26 |
| 26 | *Podallea squamulata* | Aspöck and Aspöck (1981a) | 2 |
| 27 | *Berlekrumyia africanella* | Aspöck and Aspöck (1988a) | 3 |
| 28 | *Berlekrumyia africanella* | Aspöck and Aspöck (1988a) | 9 |
| 29 | *Berlekrumyia africanella* | Aspöck and Aspöck (1988a) | 6 |
| 30 | *Manselliberotha neuropterologorum* | Aspöck and Aspöck (1988b) | 1 |
| 31 | *Nosybus minutus* | Tjeder (1959) | 256 |
| 32 | *Tanzanberotha hirsuta* | Aspöck and Hynd (1995) | 3 |
| 33 | *Lekrugeria* *koenigi* | Aspöck and Aspöck (1985) | 19 |
| 34 | *Nosybus nobilis* | Tjeder (1959) | 271 |
| 35 | *Ormiscocerus nitidipennis* | Penny and Winterton (2007) | 3 |
| 36 | *Cyrenoberotha penai* | MacLeod and Adams (1967) | 1 |
| 37 | *Spiroberotha sanctarosae* | Ardila-Camacho (2013) | 1c |
| 38 | *Spiroberotha sanctarosae* | Adams (1989) | 3 |
| 39 | *Spiroberotha sanctarosae* | Adams (1989) | 7 |
| 40 | *Spiroberotha sanctarosae* | Adams (1989) | 4 |
| 41 | *Naizema mendozina* | MacLeod and Adams (1967) | 25 |
| 42 | *Naizema mendozina* | MacLeod and Adams (1967) | 23 |
| 43 | *Naizema mendozina* | MacLeod and Adams (1967) | 22 |
| 44 | *Lomamyia flavicornis* | Carpenter (1940) | 59 |
| 45 | *Lomamyia latipennis* | Faulkner (1992) | 18 |
| 46 | *Lomamyia latipennis* | Faulkner (1992) | 6 |
